# Supplementary material
Source: PubMed Central journal article supplement (PMC5559331)
Supplement: NIHMS881420-supplement-ESI.pdf [file NIHMS881420-supplement-ESI.pdf]

## **Supplementary Information for**

### **Human Calprotectin Affects the Redox Speciation of Iron**

Toshiki G. Nakashige and Elizabeth M. Nolan\*

Department of Chemistry, Massachusetts Institute of Technology, Cambridge, MA 02139, USA

\*Corresponding author: [lnolan@mit.edu](mailto:lnolan@mit.edu)

Phone: 617-452-2495

Fax: 617-324-0505

This Supplementary Information includes:

|                                                                                                |    |
|------------------------------------------------------------------------------------------------|----|
| <b>Supplementary Tables</b> .....                                                              | S3 |
| <b>Table S1.</b> Nomenclature of Human Calprotectin (CP) Variants.....                         | S3 |
| <b>Table S2.</b> Metal Analysis of Bacterial Growth Media.....                                 | S3 |
| <b>Table S3.</b> Fe Dissociation Constants and Reduction Potentials of Fe Chelators.....       | S3 |
| <b>Supplementary Figures</b> .....                                                             | S4 |
| <b>Fig. S1.</b> Metal Depletion of Tris:TSB by CP-Ser.....                                     | S4 |
| <b>Fig. S2.</b> Metal Depletion of Tris:TSB by $\Delta$ His <sub>3</sub> Asp.....              | S4 |
| <b>Fig. S3.</b> Metal Depletion of Tris:TSB by $\Delta$ His <sub>4</sub> .....                 | S5 |
| <b>Fig. S4.</b> Iron Depletion of Bacterial Growth Media (Tris:BHI and Tris:LB) .....          | S5 |
| <b>Fig. S5.</b> Schematic Cartoon of the Ferrozine Assay Quantifying Fe(II) and Fe(III).....   | S6 |
| <b>Fig. S6.</b> Optical Absorption spectra of DP Incubated in Medium and Buffer Solutions..... | S6 |
| <b>Fig. S7.</b> Chemical Structures of Siderophores Employed in this Work.....                 | S7 |
| <b>Supplementary References</b> .....                                                          | S8 |

**Table S1.** Nomenclature of Human Calprotectin Variants

| Protein                              | S100A8 Mutation(s)           | S100A9 Mutation(s)          |
|--------------------------------------|------------------------------|-----------------------------|
| CP                                   | N/A                          | N/A                         |
| CP-Ser                               | C42S                         | C3S                         |
| CP-Ser $\Delta$ His <sub>3</sub> Asp | C42S, H83A, H87A             | C3S, H20A, D30A             |
| CP-Ser $\Delta$ His <sub>4</sub>     | C42S, H17A, H27A             | C3S, H91A, H95A             |
| CP-Ser $\Delta\Delta$                | C42S, H17A, H27A, H83A, H87A | C3S, H20A, D30A, H91A, H95A |
| CP-Ser-AAA                           | C42S                         | C3S, H103A, H104A, H105A    |

**Table S2.** Metal Analysis of Bacterial Growth Media <sup>a</sup>

| Element | Concentration ( $\mu$ M) |                   |                   |
|---------|--------------------------|-------------------|-------------------|
|         | TSB <sup>b</sup>         | BHI <sup>c</sup>  | LB <sup>d</sup>   |
| Mg      | 684 $\pm$ 67             | 157 $\pm$ 49      | 1190 $\pm$ 90     |
| Ca      | 332 $\pm$ 15             | 231 $\pm$ 12      | 337 $\pm$ 12      |
| Mn      | 0.566 $\pm$ 0.040        | 0.818 $\pm$ 0.61  | 0.893 $\pm$ 0.043 |
| Fe      | 13.8 $\pm$ 1.0           | 11.7 $\pm$ 1.6    | 14.5 $\pm$ 0.8    |
| Co      | 0.175 $\pm$ 0.016        | 0.366 $\pm$ 0.087 | 0.923 $\pm$ 0.051 |
| Ni      | 0.843 $\pm$ 0.121        | 0.227 $\pm$ 0.144 | 0.442 $\pm$ 0.401 |
| Cu      | 0.366 $\pm$ 0.028        | 0.419 $\pm$ 0.131 | 1.14 $\pm$ 0.08   |
| Zn      | 19.2 $\pm$ 1.0           | 24.0 $\pm$ 2.4    | 41.4 $\pm$ 1.5    |

<sup>a</sup> Four independent media preparations were analyzed (mean  $\pm$  SDM,  $n = 4$ ). <sup>b</sup> Tryptic soy broth.

<sup>c</sup> Blood heart infusion medium. <sup>d</sup> Luria-Bertani medium.

**Table S3.** Fe Dissociation Constant and Reduction Potential Values of Small-Molecule Chelators <sup>a</sup>

| Chelator | $K_{d,Fe(III)}$ (M) | $K_{d,Fe(II)}$ (M) | $E^{\circ}$ (V vs. SHE) | References  |
|----------|---------------------|--------------------|-------------------------|-------------|
| Ent      | $10^{-49}$          | $10^{-22}$         | -0.75                   | 1, 2, 3     |
| DFO      | $10^{-31}$          | $10^{-9}$          | -0.48                   | 4, 5        |
| EDTA     | $10^{-26}$          | $10^{-15}$         | +0.12                   | 6           |
| DP       | —                   | $10^{-18}$         | +0.82                   | 7, 8, 9, 10 |
| Phen     | —                   | $10^{-25}$         | +0.82                   | 7, 8, 10    |

<sup>a</sup> Ent, DFO, and EDTA form 1:1 Fe(II):ligand complexes. DP and Phen form 1:3 Fe(II):ligand complexes. The  $K_d$  and  $E^{\circ}$  values listed here are representative of the trends discussed in the main text and were obtained under various experimental conditions as detailed in the original references.

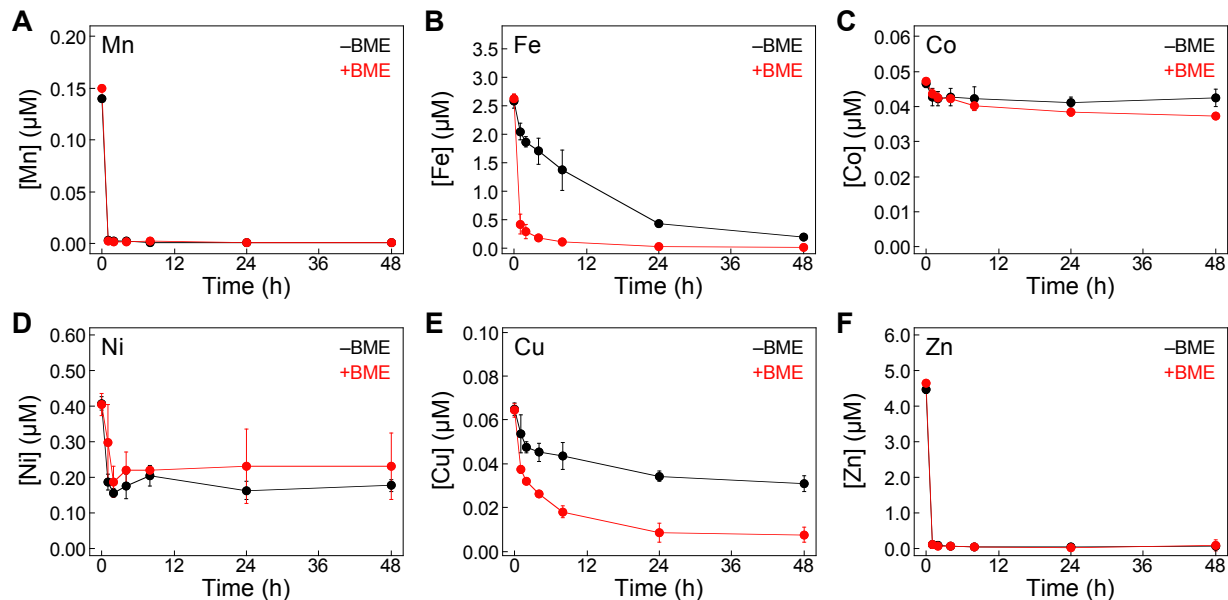

**Fig. S1.** Metal depletion by CP-Ser under aerobic conditions. Tris:TSB was treated with  $10.5 \mu\text{M}$  ( $250 \mu\text{g/mL}$ ) CP-Ser in the absence (black) or presence (red) of  $\approx 3 \text{ mM}$  BME at  $30^\circ\text{C}$ , 150 rpm. The Mn (A), Fe (B, reproduced from Fig. 2B of the main text), Co (C), Ni (D), Cu (E), and Zn (F) in the CP-treated medium was analyzed by ICP-MS at  $t = 0, 1, 2, 4, 8, 24,$  and  $48 \text{ h}$  (mean  $\pm$  SDM,  $n = 3$ ).

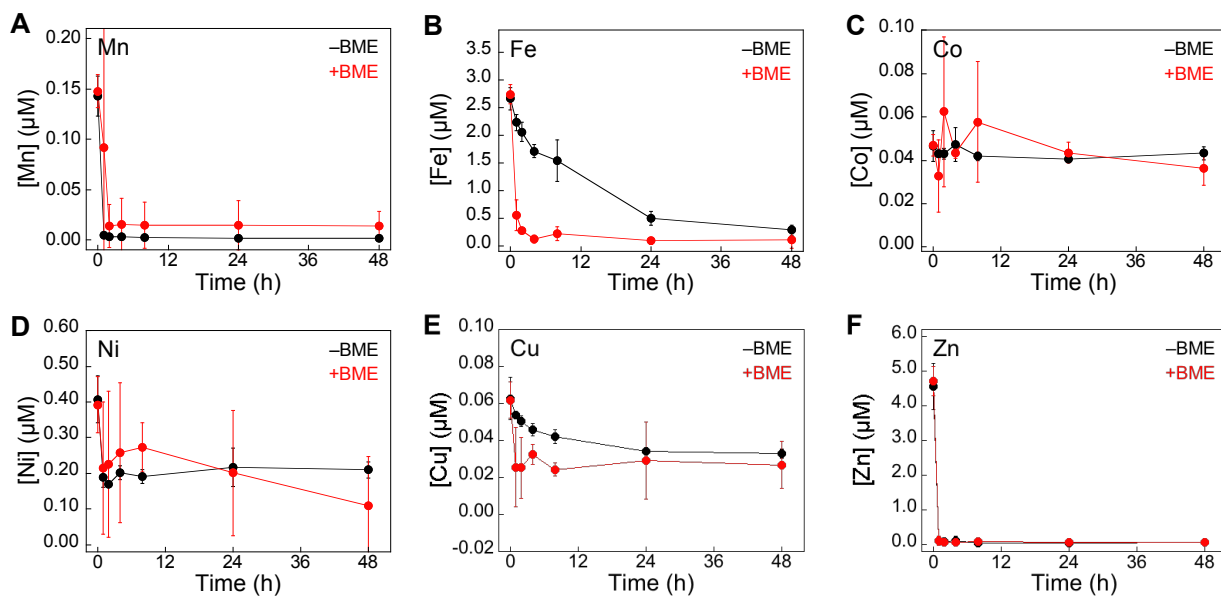

**Fig. S2.** Metal depletion by  $\Delta\text{His}_3\text{Asp}$  under aerobic conditions. Tris:TSB was treated with  $10.5 \mu\text{M}$  ( $250 \mu\text{g/mL}$ ) CP-Ser in the absence (black) or presence (red) of  $\approx 3 \text{ mM}$  BME at  $30^\circ\text{C}$ , 150 rpm. The Mn (A), Fe (B reproduced from Fig. 2C of the main text), Co (C), Ni (D), Cu (E), and Zn (F) in the CP-treated medium was analyzed by ICP-MS at  $t = 0, 1, 2, 4, 8, 24,$  and  $48 \text{ h}$  (mean  $\pm$  SDM,  $n = 3$ ).

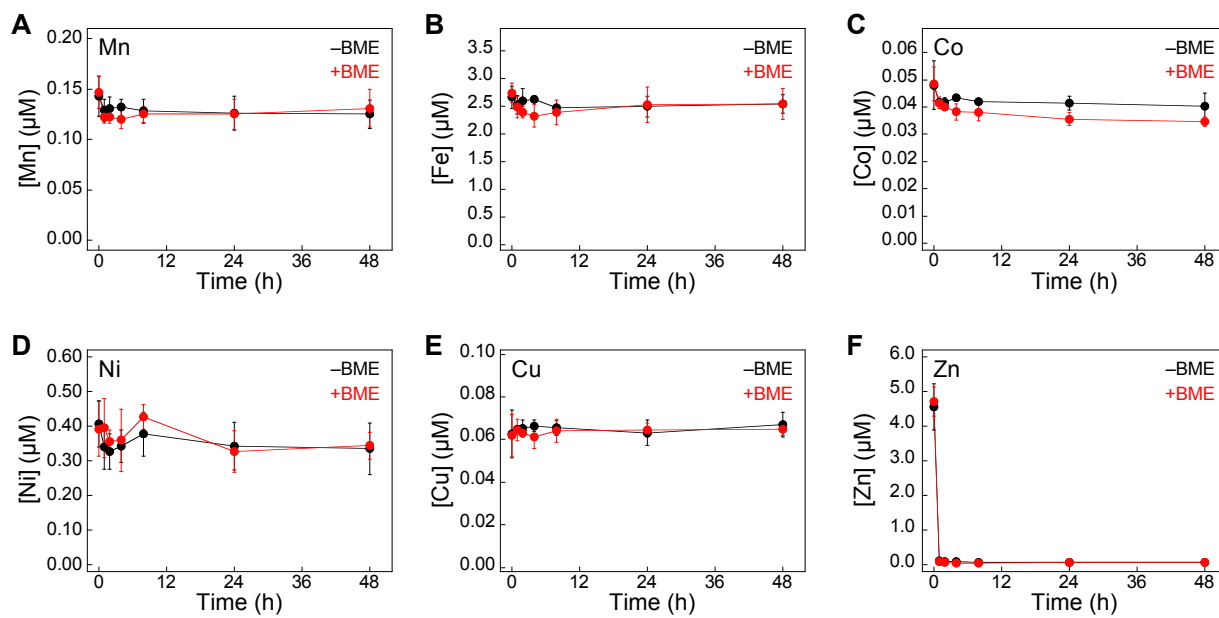

**Fig. S3.** Metal depletion by  $\Delta\text{His}_4$  under aerobic conditions. Tris:TSB was treated with  $10.5 \mu\text{M}$  ( $250 \mu\text{g/mL}$ ) CP-Ser in the absence (black) or presence (red) of  $\approx 3 \text{ mM}$  BME at  $30^\circ\text{C}$ , 150 rpm. The Mn (A), Fe (B, reproduced from Fig. 2D of the main text), Co (C), Ni (D), Cu (E), and Zn (F) in the CP-treated medium was analyzed by ICP-MS at  $t = 0, 1, 2, 4, 8, 24,$  and  $48 \text{ h}$  (mean  $\pm$  SDM,  $n = 3$ ).

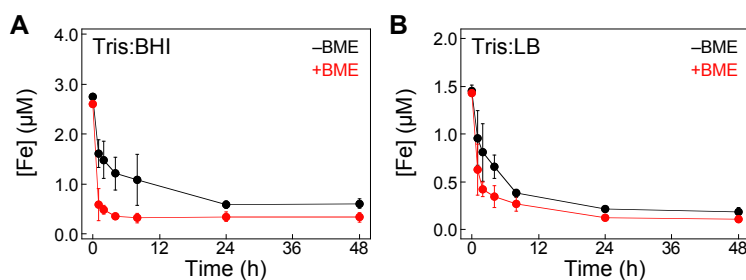

**Fig. S4.** Iron depletion of bacterial growth media by CP-Ser. (A) Tris:BHI and (B) Tris:LB were treated with  $10.5 \mu\text{M}$  ( $250 \mu\text{g/mL}$ ) CP-Ser in the absence (black) or presence (red) of  $\approx 3 \text{ mM}$  BME at  $30^\circ\text{C}$ , 150 rpm. The metal content of Fe was analyzed by ICP-MS at  $t = 0, 1, 2, 4, 8, 24,$  and  $48 \text{ h}$  (mean  $\pm$  SDM,  $n = 3$ ).

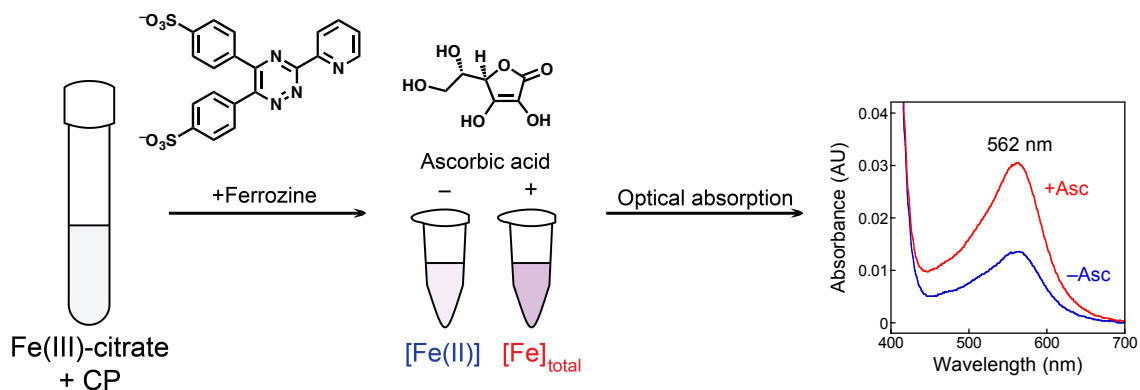

**Fig. S5.** Schematic cartoon of the ferrozine assay quantifying Fe(II) and Fe(III). A solution of 10  $\mu$ M Fe(III) citrate in 75 mM HEPES, 100 mM NaCl, 2 mM CaCl<sub>2</sub>, pH 7.0 was incubated with 10.5  $\mu$ M CP. At each time point, aliquots of the mixture were transferred to microcentrifuge tubes and treated with ferrozine in the absence (Fe(II), blue) and presence (total Fe, red) of ascorbic acid. The optical absorption spectrum of each sample was collected, and Fe concentration was quantified using a calibration curve.

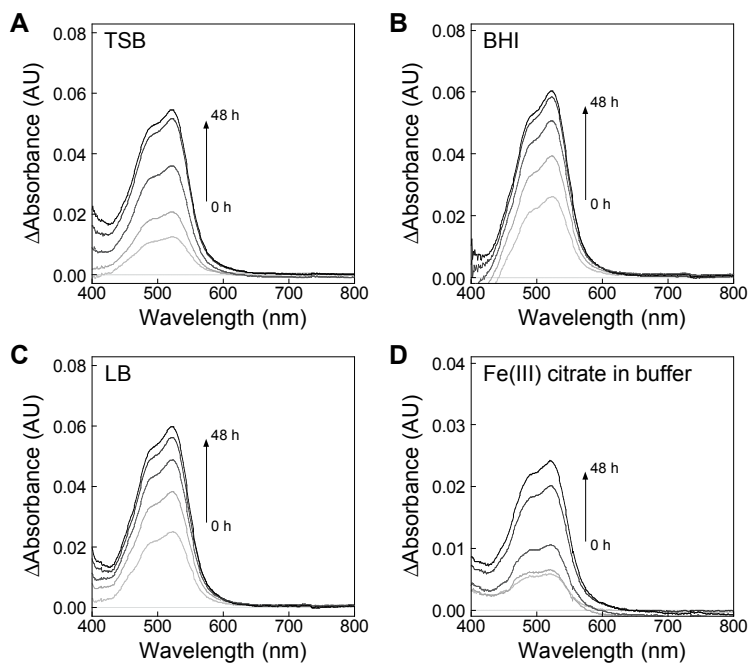

**Fig. S6.** Optical absorption spectroscopy of 2',2'-dipyridyl (DP) incubated in bacterial growth medium and buffer solutions. Representative optical absorbance difference spectra of (A) TSB, (B) BHI, (C) LB, and (D) 10  $\mu$ M Fe(III) citrate in 75 mM HEPES, 100 mM NaCl, 2 mM CaCl<sub>2</sub>, pH 7.0 incubated with 1.0 mM DP at 30 °C, 150 rpm. The spectrum collected at t = 0 h was subtracted from those of other time points (t = 2, 4, 8, 24, 48 h).

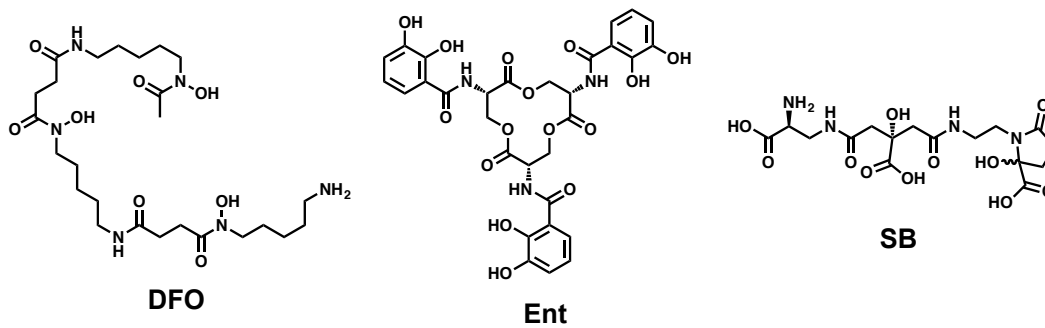

**Fig. S7.** Chemical structures of the siderophores employed in this study.

## Supplementary References

1. W. R. Harris, C. J. Carrano, S. R. Cooper, S. R. Sofen, A. E. Avdeef, J. V. McArdle and K. N. Raymond, Coordination chemistry of microbial iron transport compounds. 19. Stability constants and electrochemical behavior of ferric enterobactin and model complexes, *J. Am. Chem. Soc.*, 1979, **101**, 6097–6104.
2. C.-W. Lee, D. J. Ecker and K. N. Raymond, The pH-dependent reduction of ferric enterobactin probed by electrochemical methods and its implications for microbial iron transport, *J. Am. Chem. Soc.*, 1985, **107**, 6920–6923.
3. L. D. Loomis and K. N. Raymond, Solution equilibria of enterobactin and metal-enterobactin complexes, *Inorg. Chem.*, 1991, **30**, 906–911.
4. E. Farkas, É. A. Enyedy and H. Csóka, A comparison between the chelating properties of some dihydroxamic acids, desferrioxamine B and acetohydroxamic acid, *Polyhedron*, 1999, **18**, 2391–2398.
5. I. Spasojević, S. K. Armstrong, T. J. Brickman and A. L. Crumbliss, Electrochemical behavior of the Fe(III) complexes of the cyclic hydroxamate siderophores alcaligin and desferrioxamine E, *Inorg. Chem.*, 1999, **38**, 449–454.
6. R. M. Hutcheson, M. D. Engelmann and I. F. Cheng, Voltammetric studies of Zn and Fe complexes of EDTA: Evidence for the push mechanism, *Biometals*, 2005, **18**, 43–51.
7. K. Ogura and K. Miyamoto, Electron transfer reactions of some ferrous complexes of substituted 1,10-phenanthroline, *Electrochim. Acta*, 1977, **22**, 1357–1359.
8. Y. W. D. Chen, K. S. V. Santhanam and A. J. Bard, Solution redox couples for electrochemical energy storage: I. iron(III)-iron(II) complexes with O-phenanthroline and related ligands, *J. Electrochem. Soc.*, 1981, **128**, 1460–1467.
9. D. K. Hazra and S. C. Lahiri, The dissociation constants of 2,2'-bipyridine and its iron(II) complex in water-methanol mixtures, *Anal. Chim. Acta*, 1975, **79**, 335–340.
10. R. M. Smith and A. E. Martell, *Critical Stability Constants Volume 2: Amines*, Plenum Press, New York, 1975.
